# Supplementary material
Source: MDPI journal article supplement (https://www.mdpi.com/2079-9284/10/5/122)
Supplement: s1 [file s1]

Archive with 3 entries (3 files):
- Table S1. PRISMA_2020_checklist.pdf
- Table S2. ROB2_GRAPH.pdf
- Table S3. Summary Graph.pdf
