# Supplementary material
Source: MDPI journal article supplement (https://www.mdpi.com/2079-9284/10/5/122)
Supplement: s1 [file s1]

Table S2. Risk of bias (RoB2) graph.

| Study ID                | D1 | D2 | D3 | D4 | D5 | Overall |                                               |
|-------------------------|----|----|----|----|----|---------|-----------------------------------------------|
| Li 2022                 |    |    |    |    |    |         | Low risk                                      |
| Benzaquen 2021          |    |    |    |    |    |         | Some concerns                                 |
| Al-Dhalimi 2021         |    |    |    |    |    |         | High risk                                     |
| Park 2021               |    |    |    |    |    |         |                                               |
| Whanitphakdeedecha 2020 |    |    |    |    |    |         | D1 Randomization process                      |
| Widianingsih 2019       |    |    |    |    |    |         | D2 Deviations from the intended interventions |
| Ibrahim 2019            |    |    |    |    |    |         | D3 Missing outcome data                       |
| Badawi 2018             |    |    |    |    |    |         | D4 Measurement of the outcome                 |
| Waibel 2016             |    |    |    |    |    |         | D5 Selection of the reported result           |
| Mahmoud 2015            |    |    |    |    |    |         |                                               |
| Gawdat 2014             |    |    |    |    |    |         |                                               |
| Yun 2002                |    |    |    |    |    |         |                                               |
