# Supplementary material
Source: MDPI journal article supplement (https://www.mdpi.com/2079-9284/10/5/122)

Table S3. Summary graph of RoB2.

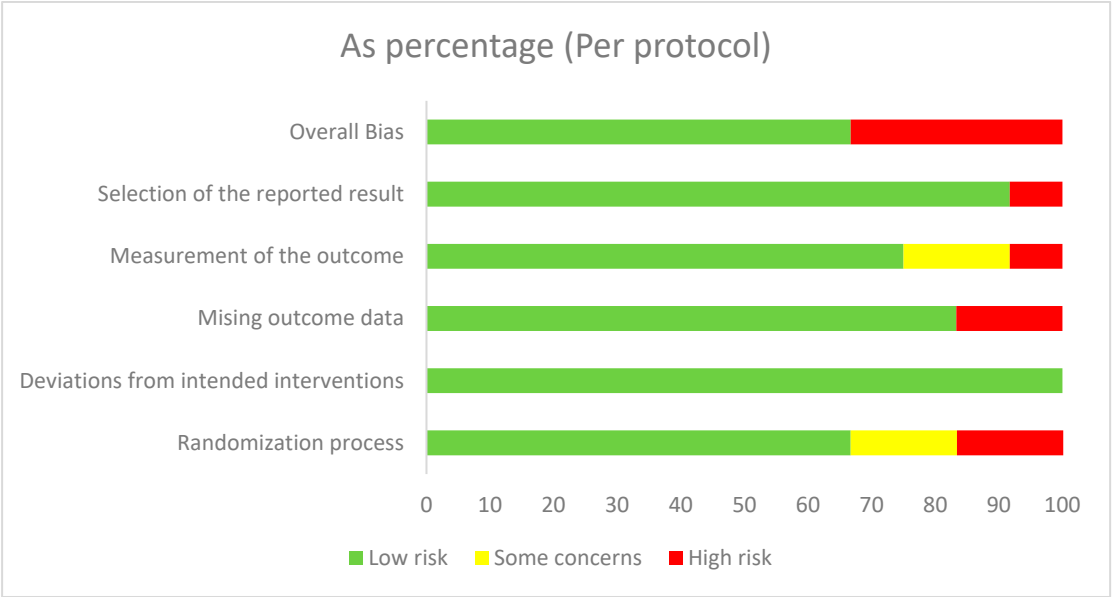

Supplement: s1 [file s1 › Table S3. Summary Graph.pdf]
